# Supplementary material
Source: PubMed Central journal article supplement (PMC3135816)
Supplement: mmc1.pdf [file mmc1.pdf]

The American Journal of Human Genetics, Volume 89

**Supplemental Data**

**Exome Sequencing Identifies *CCDC8* Mutations  
in 3-M Syndrome, Suggesting that *CCDC8* Contributes in a  
Pathway with *CUL7* and *OBSL1* to Control Human Growth**

Dan Hanson, Philip Murray, James O'Sullivan, Jill Urquhart, Sarah Daly, Sanjeev S Bhaskar,  
Leslie G. Biesecker, Mars Skae, Claire Smith, Trevor Cole, Jeremy Kirk, Kate Chandler, Helen  
Kingston, Dian Donnai, Peter E. Clayton, and Graeme C.M. Black

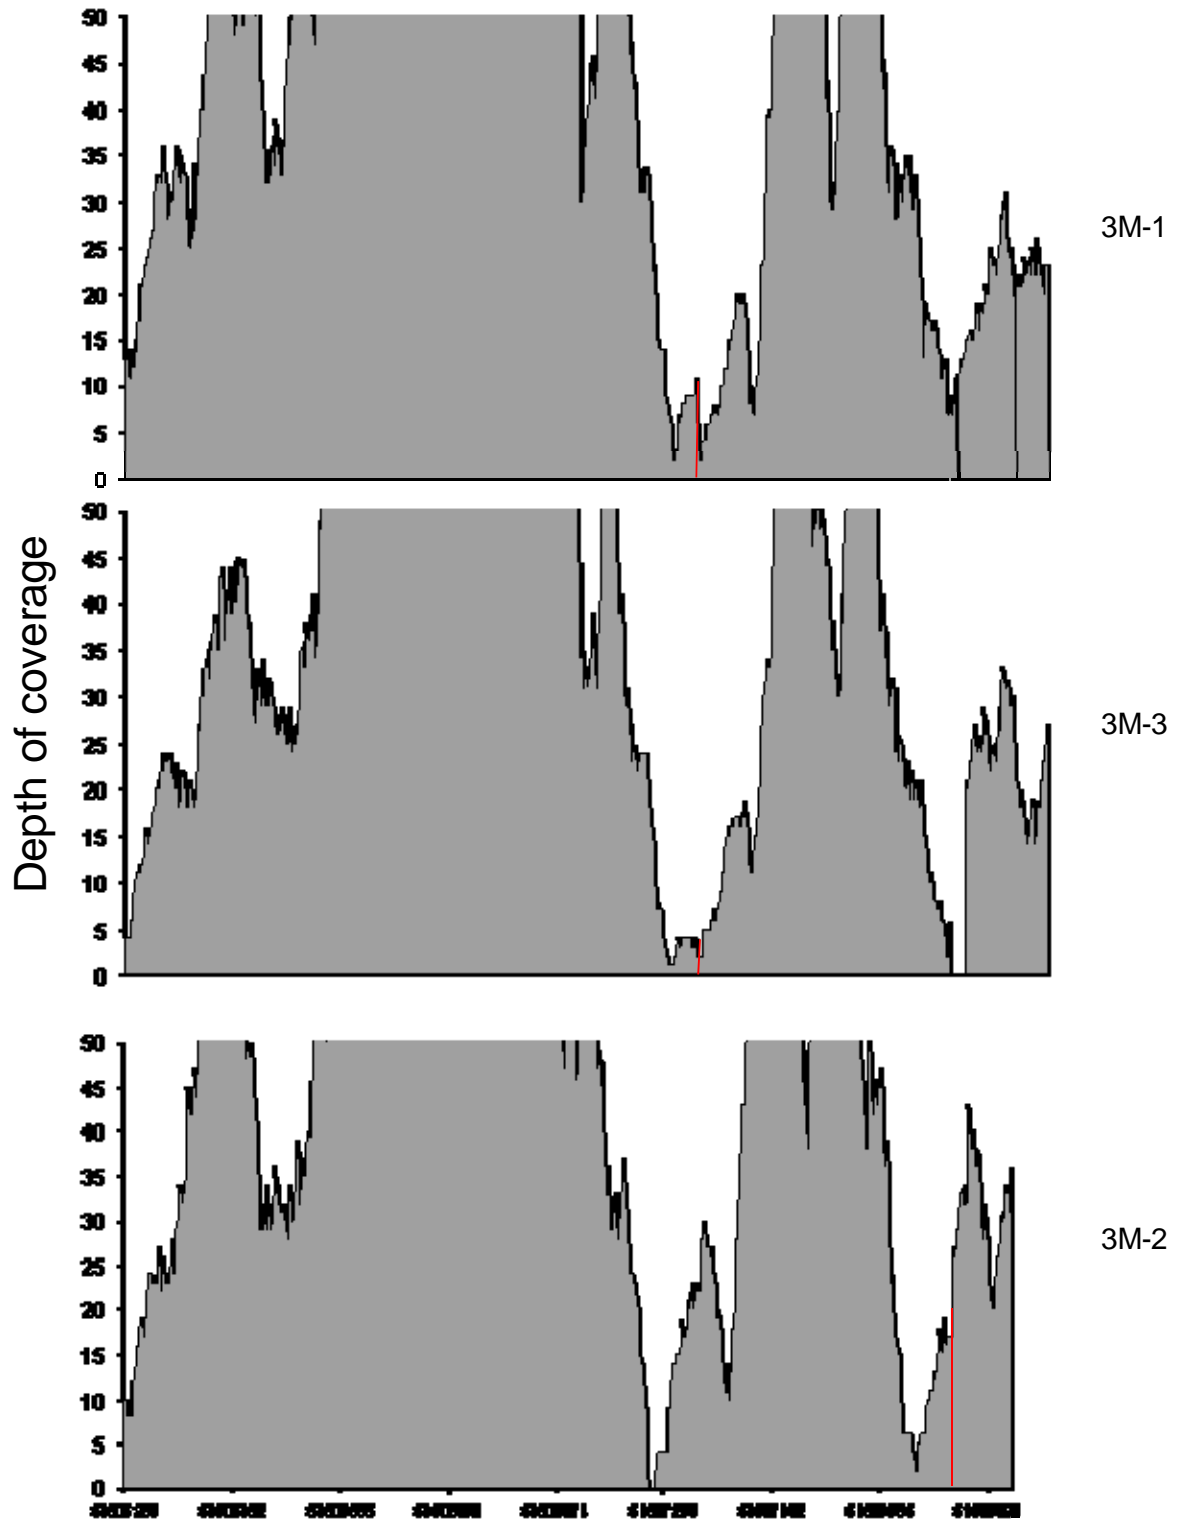

Figure S1. Exome Sequencing Coverage for Each 3-M Syndrome Individual

The red line marks the location of the mutation identified in each person. Note the low coverage seen in 3M-3 for the region surrounding c.612insG; this is due to high GC content.

Table S1. Previously Unidentified Sequence Variants in the Homozygous 19q13.2-q13.32 Region Found by Exome Sequencing of 3-M-1, -2, and -3

| Variant              | Location                | Gene                     | Consequence           | Position in cDNA | Position in protein | Amino acid change | RefAllele | Incidence     |
|----------------------|-------------------------|--------------------------|-----------------------|------------------|---------------------|-------------------|-----------|---------------|
| chr19:45594134_C/T   | chr19:45594134          | ENSG00000105227;PRX      | SYNONYMOUS_CODING     | c.1965           | p.655               | P                 | C         | 3M-1          |
| chr19:45594209_C/T   | chr19:45594209          | ENSG00000105227;PRX      | SYNONYMOUS_CODING     | c.1890           | p.630               | K                 | C         | 3M-1          |
| chr19:45594383_C/T   | chr19:45594383          | ENSG00000105227;PRX      | SYNONYMOUS_CODING     | c.1716           | p.572               | V                 | C         | 3M-1          |
| chr19:46825142_T/C   | chr19:46825142          | ENSG00000105352;CEACAM4  | SYNONYMOUS_CODING     | c.30             | p.10                | G                 | T         | 3M-3          |
| chr19:47487271_G/T   | chr19:47487271          | ENSG00000079432;CIC      | NON_SYNONYMOUS_CODING | c.2511           | p.837               | Q/H               | G         | 3M-2 and 3M-3 |
| chr19:47934999_C/T   | chr19:47934999          | ENSG00000221826;PSG3     | SYNONYMOUS_CODING     | c.147            | p.49                | K                 | C         | 3M-1          |
| chr19:48683042_G/A   | chr19:48683042          | ENSG00000176531;PHLDB3   | NON_SYNONYMOUS_CODING | c.1223           | p.409               | P/L               | G         | 3M-2          |
| chr19:48929365_C/T   | chr19:48929365          | ENSG00000105771;C19orf61 | SYNONYMOUS_CODING     | c.1290           | p.430               | L                 | C         | 3M-1          |
| chr19:49043957_G/A   | chr19:49043957          | ENSG00000159882;ZNF283   | NON_SYNONYMOUS_CODING | c.1364           | p.455               | G/D               | G         | 3M-3          |
| chr19:49281840_CTC/- | chr19:49281840-49281842 | ENSG00000186026;ZNF284   | NON_SYNONYMOUS_CODING | c.527_529        | 123-124             | FS/F              | CTC       | 3M-1 and 2    |
| chr19:49372654_G/A   | chr19:49372654          | ENSG00000167380;ZNF226   | NON_SYNONYMOUS_CODING | c.1399           | p.467               | G/R               | G         | 3M-1          |
| chr19:49583144_C/A   | chr19:49583144          | ENSG00000184280;ZNF285   | NON_SYNONYMOUS_CODING | c.1103           | p.368               | G/V               | C         | 3M-1          |
| chr19:49583168_C/G   | chr19:49583168          | ENSG00000184280;ZNF285   | NON_SYNONYMOUS_CODING | c.1079           | p.360               | C/S               | C         | 3M-1          |
| chr19:50593157_C/T   | chr19:50593157          | ENSG00000104881;PPP1R13L | SYNONYMOUS_CODING     | c.144            | p.48                | S                 | C         | 3M-3          |
| chr19:50893966_C/A   | chr19:50893966          | ENSG00000011478;QPCTL    | NON_SYNONYMOUS_CODING | c.854            | p.285               | T/K               | C         | 3M-2          |
| chr19:51005869_C/T   | chr19:51005869          | ENSG00000104941;RSPH6A   | SYNONYMOUS_CODING     | c.720            | p.240               | L                 | C         | 3M-2          |

Table S2. Haplotype Analysis of *CCDC8* (located at 19:51605469-51608681) Genomic Region with Identical Genotypes in 3M-1 and -3

| SNP ID            | db SNP ID  | Chromosome | Physical Position | 3M-1   | 3M-2   | 3M-3   |
|-------------------|------------|------------|-------------------|--------|--------|--------|
| SNP_A-8649112     | rs4802307  | 19         | 51,541,646        | AA     | AA     | AA     |
| SNP_A-1856719     | rs917946   | 19         | 51,551,898        | BB     | BB     | NoCall |
| SNP_A-8539011     | rs2239380  | 19         | 51,562,142        | NoCall | NoCall | BB     |
| SNP_A-8466857     | rs6509265  | 19         | 51,563,993        | BB     | BB     | BB     |
| SNP_A-2222449     | rs11671133 | 19         | 51,566,474        | NoCall | BB     | BB     |
| SNP_A-1810596     | rs1024782  | 19         | 51,579,407        | AA     | AA     | NoCall |
| SNP_A-8598049     | rs7359899  | 19         | 51,582,062        | BB     | BB     | BB     |
| SNP_A-8419960     | rs12459321 | 19         | 51,598,837        | NoCall | AA     | BB     |
| SNP_A-1809824     | rs7246254  | 19         | 51,610,631        | AA     | AA     | AA     |
| SNP_A-1814614     | rs453394   | 19         | 51,615,592        | BB     | AA     | NoCall |
| SNP_A-8429472     | rs1317877  | 19         | 51,618,224        | BB     | BB     | BB     |
| SNP_A-8592035     | rs11083825 | 19         | 51,618,507        | AA     | AA     | NoCall |
| SNP_A-8622580     | rs10418662 | 19         | 51,621,865        | AA     | AA     | NoCall |
| SNP_A-2033659     | rs404997   | 19         | 51,621,987        | BB     | BB     | BB     |
| SNP_A-8436099     | rs427250   | 19         | 51,623,902        | AA     | AA     | NoCall |
| SNP_A-4199950     | rs371657   | 19         | 51,629,571        | AA     | AA     | AA     |
| AFFX-SNP_11389240 | rs371657   | 19         | 51,629,571        | AA     | AA     | NoCall |
| SNP_A-8640758     | rs11667187 | 19         | 51,640,083        | AA     | AA     | AA     |
| SNP_A-8520795     | rs17728638 | 19         | 51,644,474        | AA     | AA     | AA     |
| SNP_A-2225336     | rs8108405  | 19         | 51,646,246        | BB     | BB     | BB     |
| SNP_A-4195078     | rs7254494  | 19         | 51,646,309        | BB     | BB     | BB     |
| SNP_A-1961664     | rs4803953  | 19         | 51,650,847        | AA     | BB     | AA     |
| SNP_A-8334115     | rs6509279  | 19         | 51,670,409        | BB     | AA     | NoCall |
| SNP_A-8531024     | rs16980543 | 19         | 51,694,755        | BB     | NoCall | BB     |
| SNP_A-8712358     | rs10403174 | 19         | 51,699,071        | BB     | NoCall | BB     |
| SNP_A-8310429     | rs7251461  | 19         | 51,700,261        | AA     | AA     | AA     |
| SNP_A-8373130     | rs892106   | 19         | 51,706,775        | BB     | AA     | BB     |
| SNP_A-2089221     | rs6509283  | 19         | 51,712,404        | AA     | BB     | AA     |
| SNP_A-8544931     | rs745831   | 19         | 51,715,250        | AA     | BB     | NoCall |
| SNP_A-8544508     | rs10408465 | 19         | 51,717,495        | AA     | BB     | NoCall |

3M-2 has an alternative haplotype suggesting that c.612insG in 3M-1 and -3 is a founder mutation.

Table S3. SNPs Identified in CCDC8 in the ClinSeq Cohort of Controls

| Gene  | Position | Ref_allele | Var_allele | Ref_aa | Var_aa | aa_pos | SNP ID      | CSc_homref | CSc_hetref | CSc_homnonref | CSc_hetnonref |
|-------|----------|------------|------------|--------|--------|--------|-------------|------------|------------|---------------|---------------|
| CCDC8 | 51607022 | C          | T          | G      | R      | 296    | rs11880658  | 398        | 3          | 0             | 0             |
| CCDC8 | 51606995 | C          | G          | E      | Q      | 305    | ss342568898 | 400        | 1          | 0             | 0             |
| CCDC8 | 51606954 | A          | C          | N      | K      | 318    | ss342568899 | 396        | 5          | 0             | 0             |
| CCDC8 | 51606931 | T          | C          | D      | G      | 326    | ss342568900 | 374        | 26         | 1             | 0             |
| CCDC8 | 51606863 | C          | G          | A      | P      | 349    | rs28498765  | 375        | 1          | 0             | 0             |
| CCDC8 | 51606767 | C          | T          | D      | N      | 381    | ss342568901 | 357        | 42         | 2             | 0             |
| CCDC8 | 51606761 | G          | A          | H      | Y      | 383    | rs34186470  | 271        | 118        | 12            | 0             |
| CCDC8 | 51606387 | C          | G          | K      | N      | 507    | rs2279517   | 357        | 41         | 2             | 0             |

Four novel missense SNPs and four previously identified SNPs in CCDC8 were present in a cohort of 401 controls. The variants identified in the 3-M individuals were not identified. These data together support the pathogenicity of CCDC8 mutations in 3-M syndrome.
